# Supplementary material
Source: publisher figshare collection journal article supplement (https://gsajournals.figshare.com/ndownloader/files/26476784)
Supplement: Supplementary file 1 [file 26476784]

## Sheet: Legend
TITLE	Supplementary Table 1. Summary of the Transcription Factors analyzed in the genetic screen.
Locus
Chromosome	DEFINITION
Screening Status	Transcription Factor locus absent in the KO strain.
Luc Locus	Linkage group (LG) where the Knockout is located
	No KO Available = Knockouts were no available at the start of the screen; Failed Offspring = the cross was unsuccesful to produce reporter+knockout strains; Analyzed Strains = knockout strains analized in the primary screen
	Genomic location of the minimal reporter used. his-3, csr-1, or none

## Sheet: List of TFs
Locus	Chromosome	Screening Status	Luc Locus
NCU00017	LGIII	No KO Available	none
NCU00019	LGIII	Analyzed Strains	his-3
NCU00038	LGIII	Failed Offspring	his-3
NCU00054	LGIII	Analyzed Strains	his-3
NCU00090	LGIII	Analyzed Strains	his-3
NCU00097	LGIII	Analyzed Strains	his-3
NCU00100	LGIII	Analyzed Strains	his-3
NCU00144	LGIII	Analyzed Strains	his-3
NCU00155	LGIII	Analyzed Strains	his-3
NCU00180	LGIII	Analyzed Strains	his-3
NCU00223	LGIII	Analyzed Strains	his-3
NCU00282	LGIII	Analyzed Strains	his-3
NCU00285	LGIII	Analyzed Strains	his-3
NCU00289	LGIII	Analyzed Strains	his-3
NCU00329	LGIII	Analyzed Strains	his-3
NCU00340	LGIII	Failed Offspring	his-3
NCU00344	LGIII	No KO Available	none
NCU00392	LGIII	No KO Available	none
NCU00445	LGIII	Analyzed Strains	his-3
NCU00499	LGI	Analyzed Strains	his-3
NCU00694	LGI	Analyzed Strains	his-3
NCU00749	LGI	Analyzed Strains	his-3
NCU00753	LGI	No KO Available	none
NCU00833	LGI	Failed Offspring	his-3
NCU00902	LGI	Analyzed Strains	his-3
NCU00945	LGI	Failed Offspring	csr-1
NCU01074	LGV	Failed Offspring	his-3
NCU01097	LGV	Analyzed Strains	his-3
NCU01122	LGV	Analyzed Strains	his-3
NCU01145	LGV	Analyzed Strains	his-3
NCU01154	LGV	Analyzed Strains	his-3
NCU01209	LGV	Analyzed Strains	his-3
NCU01238	LGV	Analyzed Strains	his-3
NCU01243	LGV	Analyzed Strains	his-3
NCU01312	LGV	Analyzed Strains	his-3
NCU01345	LGV	Failed Offspring	his-3
NCU01386	LGV	Failed Offspring	his-3
NCU01414	LGV	Failed Offspring	his-3
NCU01459	LGV	Failed Offspring	his-3
NCU01461	LGV	No KO Available	none
NCU01478	LGV	Analyzed Strains	his-3
NCU01629	LGII	Analyzed Strains	his-3
NCU01640	LGII	Analyzed Strains	his-3
NCU01706	LGII	Analyzed Strains	his-3
NCU01856	LGI	No KO Available	none
NCU01871	LGI	Failed Offspring	his-3
NCU01924	LGI	Failed Offspring	his-3
NCU01958	LGI	No KO Available	none
NCU01960	LGI	No KO Available	none
NCU01994	LGI	Failed Offspring	his-3
NCU02012	LGI	Analyzed Strains	his-3
NCU02017	LGI	Analyzed Strains	his-3
NCU02094	LGI	Analyzed Strains	his-3
NCU02142	LGI	Analyzed Strains	csr-1
NCU02173	LGI	Analyzed Strains	his-3
NCU02182	LGI	Analyzed Strains	his-3
NCU02203	LGVII	Analyzed Strains	his-3
NCU02214	LGVII	Analyzed Strains	his-3
NCU02307	LGVII	Analyzed Strains	his-3
NCU02315	LGVII	Failed Offspring	his-3
NCU02326	LGVII	Analyzed Strains	his-3
NCU02356	LGVII	Analyzed Strains	his-3
NCU02386	LGVII	Analyzed Strains	his-3
NCU02413	LGVII	Analyzed Strains	his-3
NCU02487	LGI	Failed Offspring	csr-1
NCU02525	LGI	Analyzed Strains	csr-1
NCU02558	LGI	Failed Offspring	his-3
NCU02576	LGI	Analyzed Strains	csr-1
NCU02612	LGI	No KO Available	none
NCU02621	LGI	Failed Offspring	his-3
NCU02666	LGI	Analyzed Strains	his-3
NCU02671	LGI	Failed Offspring	his-3
NCU02695	LGI	Failed Offspring	his-3
NCU02699	LGI	Analyzed Strains	csr-1
NCU02713	LGI	Failed Offspring	his-3
NCU02719	LGI	Failed Offspring	his-3
NCU02724	LGI	Failed Offspring	his-3
NCU02787	LGI	Failed Offspring	his-3
NCU02819	LGI	Failed Offspring	his-3
NCU02853	LGI	No KO Available	none
NCU02896	LGI	Analyzed Strains	his-3
NCU02934	LGI	Analyzed Strains	his-3
NCU02957	LGI	Analyzed Strains	his-3
NCU02991	LGI	No KO Available	none
NCU03033	LGI	Failed Offspring	his-3
NCU03043	LGI	Analyzed Strains	his-3
NCU03070	LGI	Analyzed Strains	csr-1
NCU03077	LGI	Failed Offspring	his-3
NCU03110	LGI	Analyzed Strains	csr-1
NCU03120	LGI	Analyzed Strains	csr-1
NCU03126	LGI	Failed Offspring	his-3
NCU03184	LGI	No KO Available	none
NCU03206	LGI	Failed Offspring	csr-1
NCU03248	LGI	No KO Available	none
NCU03266	LGI	Failed Offspring	csr-1
NCU03273	LGI	Failed Offspring	his-3
NCU03320	LGI	Analyzed Strains	his-3
NCU03352	LGII	Analyzed Strains	his-3
NCU03356	LGII	Analyzed Strains	his-3
NCU03416	LGII	Failed Offspring	his-3
NCU03417	LGII	Analyzed Strains	his-3
NCU03421	LGII	No KO Available	none
NCU03481	LGII	Analyzed Strains	his-3
NCU03489	LGII	Analyzed Strains	his-3
NCU03529	LGII	No KO Available	none
NCU03536	LGII	Failed Offspring	his-3
NCU03552	LGII	No KO Available	none
NCU03593	LGV	Analyzed Strains	his-3
NCU03643	LGV	Analyzed Strains	his-3
NCU03649	LGV	Analyzed Strains	his-3
NCU03686	LGV	Failed Offspring	his-3
NCU03699	LGV	Analyzed Strains	his-3
NCU03725	LGV	Failed Offspring	his-3
NCU03728	LGV	Analyzed Strains	his-3
NCU03878	LGVI	Analyzed Strains	his-3
NCU03892	LGVI	Failed Offspring	his-3
NCU03905	LGVI	Analyzed Strains	his-3
NCU03931	LGVI	Analyzed Strains	his-3
NCU03938	LGVI	Analyzed Strains	his-3
NCU03960	LGVI	Analyzed Strains	his-3
NCU03975	LGVI	No KO Available	none
NCU04001	LGVI	Analyzed Strains	his-3
NCU04022	LGVI	Analyzed Strains	his-3
NCU04050	LGVI	Analyzed Strains	his-3
NCU04058	LGVI	Analyzed Strains	his-3
NCU04079	LGVI	Analyzed Strains	his-3
NCU04179	LGV	Analyzed Strains	his-3
NCU04211	LGV	Analyzed Strains	his-3
NCU04295	LGV	Analyzed Strains	his-3
NCU04359	LGIV	Analyzed Strains	his-3
NCU04390	LGIV	Analyzed Strains	his-3
NCU04561	LGV	Analyzed Strains	his-3
NCU04619	LGV	Analyzed Strains	his-3
NCU04628	LGV	Analyzed Strains	his-3
NCU04663	LGV	Analyzed Strains	his-3
NCU04671	LGV	Failed Offspring	his-3
NCU04729	LGVI	Analyzed Strains	his-3
NCU04731	LGVI	Analyzed Strains	his-3
NCU04770	LGVI	No KO Available	none
NCU04773	LGVI	Analyzed Strains	his-3
NCU04827	LGVI	Analyzed Strains	his-3
NCU04830	LGVI	No KO Available	none
NCU04848	LGVI	Analyzed Strains	his-3
NCU04851	LGIV	Analyzed Strains	his-3
NCU04866	LGIV	Analyzed Strains	his-3
NCU04960	LGIV	Failed Offspring	his-3
NCU05022	LGVI	Analyzed Strains	his-3
NCU05024	LGVI	Failed Offspring	his-3
NCU05025	LGVI	Analyzed Strains	his-3
NCU05051	LGVI	Analyzed Strains	his-3
NCU05061	LGVI	Failed Offspring	his-3
NCU05064	LGVI	Analyzed Strains	his-3
NCU05145	LGVI	Analyzed Strains	his-3
NCU05208	LGIV	Analyzed Strains	his-3
NCU05242	LGIV	Analyzed Strains	his-3
NCU05257	LGIV	Failed Offspring	his-3
NCU05285	LGIV	No KO Available	none
NCU05294	LGIV	Analyzed Strains	his-3
NCU05308	LGIV	Analyzed Strains	his-3
NCU05383	LGII	Analyzed Strains	his-3
NCU05411	LGII	Analyzed Strains	his-3
NCU05414	LGII	Failed Offspring	his-3
NCU05536	LGVI	Analyzed Strains	his-3
NCU05635	LGVI	Failed Offspring	his-3
NCU05637	LGVI	Analyzed Strains	his-3
NCU05681	LGIII	No KO Available	none
NCU05685	LGIII	Analyzed Strains	his-3
NCU05733	LGIII	Failed Offspring	his-3
NCU05767	LGVII	Analyzed Strains	his-3
NCU05891	LGVII	Failed Offspring	his-3
NCU05909	LGVI	Analyzed Strains	his-3
NCU05970	LGVI	No KO Available	none
NCU05994	LGVI	Failed Offspring	his-3
NCU05996	LGVI	Analyzed Strains	his-3
NCU06028	LGVII	Analyzed Strains	his-3
NCU06068	LGVII	Analyzed Strains	his-3
NCU06095	LGVII	Failed Offspring	his-3
NCU06140	LGVII	Analyzed Strains	his-3
NCU06145	LGVII	Analyzed Strains	his-3
NCU06173	LGIII	Analyzed Strains	his-3
NCU06186	LGIII	Analyzed Strains	his-3
NCU06213	LGIII	Analyzed Strains	his-3
NCU06324	LGIV	No KO Available	none
NCU06399	LGIV	Failed Offspring	his-3
NCU06407	LGIII	Analyzed Strains	his-3
NCU06443	LGIII	No KO Available	none
NCU06487	LGIII	Failed Offspring	his-3
NCU06503	LGIII	Failed Offspring	his-3
NCU06521	LGIV	No KO Available	none
NCU06551	LGIV	No KO Available	none
NCU06560	LGIV	Failed Offspring	his-3
NCU06614	LGIV	Analyzed Strains	his-3
NCU06656	LGV	Analyzed Strains	his-3
NCU06701	LGV	Failed Offspring	his-3
NCU06707	LGV	Failed Offspring	his-3
NCU06744	LGII	Analyzed Strains	his-3
NCU06799	LGII	Analyzed Strains	his-3
NCU06874	LGVII	Analyzed Strains	his-3
NCU06907	LGVII	Failed Offspring	his-3
NCU06919	LGVII	Analyzed Strains	his-3
NCU06920	LGVII	Failed Offspring	his-3
NCU06965	LGIV	Analyzed Strains	his-3
NCU06971	LGIV	Analyzed Strains	his-3
NCU06975	LGIV	Analyzed Strains	his-3
NCU06990	LGIV	Failed Offspring	his-3
NCU06994	LGIV	Failed Offspring	his-3
NCU07000	LGIV	No KO Available	none
NCU07007	LGIV	Failed Offspring	his-3
NCU07139	LGVI	Analyzed Strains	his-3
NCU07246	LGV	Failed Offspring	his-3
NCU07312	LGIV	Failed Offspring	his-3
NCU07374	LGI	Failed Offspring	his-3
NCU07379	LGI	Analyzed Strains	his-3
NCU07392	LGI	Analyzed Strains	his-3
NCU07430	LGI	No KO Available	none
NCU07535	LGIII	Analyzed Strains	his-3
NCU07543	LGIII	Failed Offspring	his-3
NCU07561	LGIII	Analyzed Strains	his-3
NCU07568	LGIII	Failed Offspring	his-3
NCU07575	LGIII	Analyzed Strains	his-3
NCU07587	LGIV	Analyzed Strains	his-3
NCU07669	LGIV	Analyzed Strains	his-3
NCU07675	LGIV	Analyzed Strains	his-3
NCU07705	LGIV	Analyzed Strains	his-3
NCU07728	LGIV	Analyzed Strains	his-3
NCU07788	LGV	Analyzed Strains	his-3
NCU07834	LGIII	Analyzed Strains	his-3
NCU07863	LGIII	Failed Offspring	his-3
NCU07893	LGIV	Analyzed Strains	his-3
NCU07900	LGIV	Analyzed Strains	his-3
NCU07945	LGIV	Failed Offspring	his-3
NCU07952	LGIV	Failed Offspring	his-3
NCU08000	LGIV	Analyzed Strains	his-3
NCU08042	LGIV	Analyzed Strains	his-3
NCU08049	LGI	Analyzed Strains	his-3
NCU08055	LGI	Analyzed Strains	his-3
NCU08063	LGI	Analyzed Strains	his-3
NCU08136	LGVII	No KO Available	none
NCU08159	LGVII	No KO Available	none
NCU08184	LGVII	Failed Offspring	his-3
NCU08289	LGIV	Analyzed Strains	his-3
NCU08294	LGIV	Analyzed Strains	his-3
NCU08307	LGIV	Failed Offspring	his-3
NCU08443	LGII	Analyzed Strains	his-3
NCU08480	LGII	Analyzed Strains	his-3
NCU08512	LGII	Failed Offspring	his-3
NCU08527	LGIII	Analyzed Strains	his-3
NCU08594	LGI	No KO Available	none
NCU08634	LGI	Analyzed Strains	his-3
NCU08651	LGIV	Analyzed Strains	his-3
NCU08652	LGIV	Analyzed Strains	his-3
NCU08658	LGIV	Analyzed Strains	his-3
NCU08726	LGII	Failed Offspring	his-3
NCU08744	LGII	Analyzed Strains	his-3
NCU08807	LGIV	Failed Offspring	his-3
NCU08848	LGV	Analyzed Strains	his-3
NCU08857	LGV	Failed Offspring	his-3
NCU08891	LGV	Analyzed Strains	his-3
NCU08899	LGV	Analyzed Strains	his-3
NCU08901	LGV	Analyzed Strains	his-3
NCU08932	LGV	No KO Available	none
NCU08999	LGIII	Analyzed Strains	his-3
NCU09033	LGVII	Analyzed Strains	his-3
NCU09068	LGI	Failed Offspring	csr-1
NCU09120	LGI	Analyzed Strains	csr-1
NCU09197	LGI	Failed Offspring	csr-1
NCU09205	LGI	Analyzed Strains	csr-1
NCU09214	LGI	Failed Offspring	his-3
NCU09252	LGI	Analyzed Strains	his-3
NCU09315	LGI	Analyzed Strains	csr-1
NCU09329	LGI	Failed Offspring	his-3
NCU09333	LGI	Failed Offspring	csr-1
NCU09387	LGI	Analyzed Strains	csr-1
NCU09496	LGIII	No KO Available	none
NCU09529	LGV	Analyzed Strains	his-3
NCU09549	LGV	Analyzed Strains	his-3
NCU09556	LGV	Failed Offspring	his-3
NCU09576	LGVII	Analyzed Strains	his-3
NCU09615	LGII	Analyzed Strains	his-3
NCU09739	LGIV	Analyzed Strains	his-3
NCU09804	LGI	Failed Offspring	his-3
NCU09829	LGV	Analyzed Strains	his-3
NCU09915	LGIV	Analyzed Strains	his-3
NCU09974	LGI	Failed Offspring	his-3
NCU09995	LGI	Failed Offspring	his-3
NCU10006	LGI	Analyzed Strains	his-3
NCU10080	LGVII	Analyzed Strains	his-3
NCU10258	LGIV	No KO Available	none
NCU10346	LGII	Failed Offspring	his-3
NCU10570	LGI	No KO Available	none
NCU10597	LGVI	Analyzed Strains	his-3
NCU10697	LGVI	Analyzed Strains	his-3
NCU11138	LGV	No KO Available	none
NCU11295	LGIV	No KO Available	none
NCU12126	LGVI	No KO Available	none
NCU15829	LGIV	No KO Available	none
NCU16491	LGI	No KO Available	none
NCU16494	LGI	No KO Available	none
NCU16599	LGII	No KO Available	none
NCU16667	LGIII	No KO Available	none
NCU16793	LGIV	No KO Available	none
NCU16898	LGIV	No KO Available	none
